# Supplementary material for: Electrodeposited high strength, thermally stable spectrally selective rhenium nickel inverse opals
Source: Royal Society of Chemistry journal article supplement (doi:10.1039/c7nr03567e), 2017-01-01
Supplement: c7nr03567e1.pdf [file c7nr03567e1.pdf]

## SUPPLEMENTARY INFORMATION

### **Electrodeposited High Strength, Thermally Stable Spectrally Selective Rhenium Nickel Inverse Opals**

Runyu Zhang,<sup>acd</sup> Joseph Cohen,<sup>a</sup> Shanhui Fan<sup>e</sup> and Paul V. Braun<sup>\*abcd</sup>

<sup>a</sup> Department of Materials Science and Engineering, University of Illinois at Urbana Champaign, Urbana, IL, 61801, USA

<sup>b</sup> Department of Chemistry, University of Illinois at Urbana Champaign, Urbana, IL, 61801, USA

<sup>c</sup> Frederick Seitz Materials Research Laboratory, University of Illinois at Urbana Champaign, Urbana, IL, 61801, USA

<sup>d</sup> Beckman Institute of Advanced Science and Technology, University of Illinois at Urbana Champaign, Urbana, IL, 61801, USA

<sup>e</sup> Department of Electrical Engineering, Stanford University, Stanford, California, 94305, USA

#### **Corresponding Author**

\*Email: [pbraun@illinois.edu](mailto:pbraun@illinois.edu)

## Estimation on the cost of Rhenium

To estimate the cost ( $c$ ) of Rhenium needed in a sample with a practical size, a simple calculation can be made using this equation:

$$c = C\rho V = C\rho(Ah\phi)$$

where  $C$  is the unit cost of Rhenium:  $\$1050 / \text{lb} = \$ 2.315 / \text{g}$  (BASF, June 26, 2017),  $\rho$  is the density of Rhenium:  $21.02 \text{ g/cm}^3$ ,  $A$  is the area of the sample,  $h$  is the material thickness and  $\phi$  is the solid filling fraction of porous material.

Assuming the sample is pure Re, with  $A$  equals  $10 \text{ cm} \times 10 \text{ cm}$ , thickness  $h$  equals  $5 \text{ }\mu\text{m}$ , and  $\phi$  is  $\sim 20\%$ , the total cost of Re in this sample is  $\$0.48$ .

## Comparison of Thermal Stability and Mechanical Properties

| Material                       | Bulk Material<br>$T_{\text{melting}}(^{\circ}\text{C})$ | Processing Method               | Processing Temperature<br>( $^{\circ}\text{C}$ ) | Thermal Stability<br>( $^{\circ}\text{C}$ ) | Duration<br>(h) | Reference |
|--------------------------------|---------------------------------------------------------|---------------------------------|--------------------------------------------------|---------------------------------------------|-----------------|-----------|
| Fe                             | 1538                                                    | Pyrolysis                       | ~400                                             | Unknown                                     | Unknown         | 1         |
| Co                             | 1495                                                    | Pyrolysis                       | ~400                                             | 500-700                                     | ~1              | 2         |
| Ni                             | 1455                                                    | Electroplating<br>(Aqueous)     | RT                                               | 550-600                                     | ~1              | 3         |
| W/Mo                           | 3422/2623                                               | Pyrolysis                       | 500-1000                                         | 800-1000                                    | ~0.5            | 4         |
| W                              | 3422                                                    | Electroplating<br>(Molten Salt) | 425                                              | <1000                                       | <0.5            | 5         |
| W                              | 3422                                                    | ALD                             | >200                                             | >1000                                       | >10             | 6         |
| $\text{Re}_{88}\text{Ni}_{12}$ | 3182/1455                                               | Electroplating<br>(Aqueous)     | near RT                                          | 1000                                        | ~5              | This work |

**Table S1.** Summary of available results on the thermal stability of 3D refractory metallic inverse opals.

| Material                       | E (GPa) | H (GPa)    | Reference |
|--------------------------------|---------|------------|-----------|
| SiC                            | 25      | 0.56       | 7         |
| TiO <sub>2</sub> @ Silica      | 1.7-8.3 | 0.04 - 0.4 | 8         |
| Al <sub>2</sub> O <sub>3</sub> | 2.5-7.5 | 0.15-0.3   | 9         |
| Cu                             | 20      | NA         | 10        |
| Ni                             | ~28     | ~0.3       | This work |
| $\text{Re}_{88}\text{Ni}_{12}$ | ~35     | ~0.8       | This work |

**Table S2.** List of results on the elastic modulus (E) and hardness (H) of available ceramic and metallic 3D inverse opals.

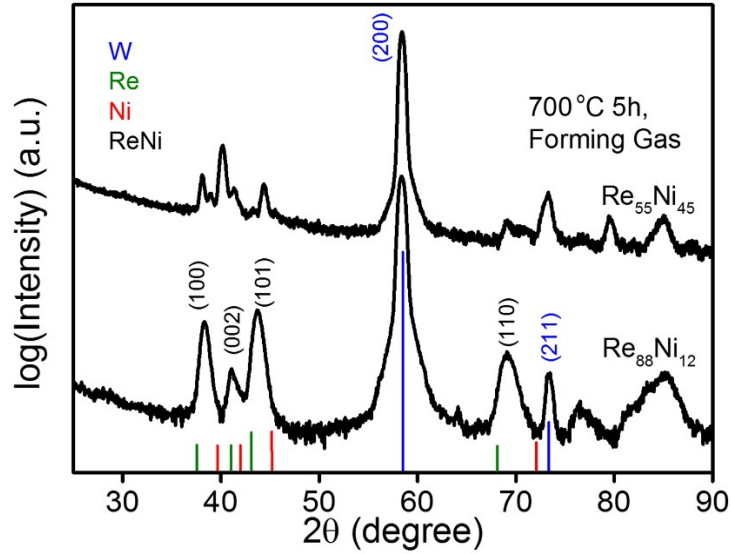

**Figure S1.** The XRD spectra collected from  $\text{Re}_{55}\text{Ni}_{45}$  and  $\text{Re}_{88}\text{Ni}_{12}$  sample after annealing under  $700^\circ\text{C}$  for 5h.

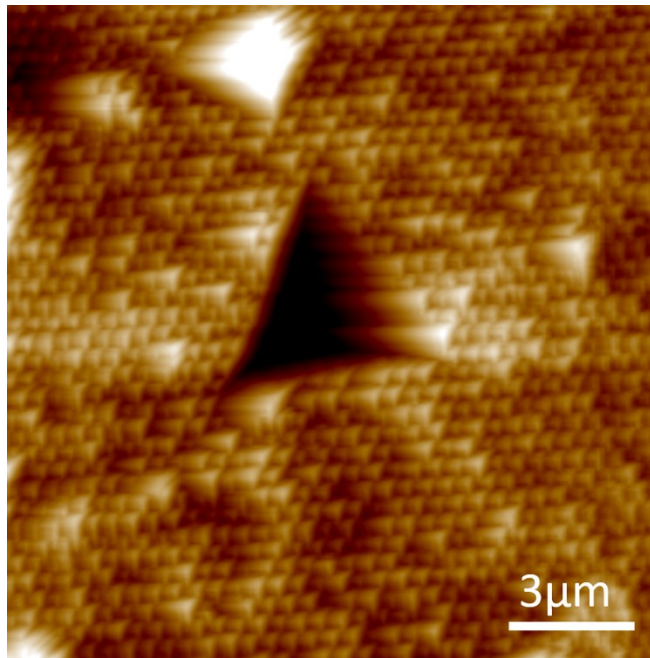

**Figure S2.** The morphology of the sample after nanoindentation where the dark triangular region reflects the shape of the Berkovich tip and the surrounding regions are the inverse opal without indentation. As can be seen from the image the material is plastically deformed after the indentation.

## Reference

- 1 H. Yan, C. F. Blanford, J. C. Lytle, C. B. Carter, W. H. Smyrl and A. Stein, *Chem. Mater.*, 2001, **13**, 4314–4321.
- 2 C. F. Blanford, C. B. Carter and A. Stein, *J. Mater. Sci.*, 2008, **43**, 3539–3552.
- 3 X. Yu, Y.-J. Lee, R. Furstenberg, J. O. White and P. V. Braun, *Adv. Mater.*, 2007, **19**, 1689–1692.
- 4 N. R. Denny, F. Li, D. J. Norris and A. Stein, *J. Mater. Chem.*, 2010, **20**, 1538–1545.
- 5 K. A. Arpin, M. D. Losego and P. V. Braun, *Chem. Mater.*, 2011, **23**, 4783–4788.
- 6 K. A. Arpin, M. D. Losego, A. N. Cloud, H. Ning, J. Mallek, N. P. Sergeant, L. Zhu, Z. Yu, B. Kalanyan, G. N. Parsons, G. S. Girolami, J. R. Abelson, S. Fan and P. V. Braun, *Nat. Commun.*, 2013, **4**, 2630.
- 7 J. Zhou, H. Li, L. Ye, J. Liu, J. Wang, T. Zhao, L. Jiang and Y. Song, *J. Phys. Chem. C*, 2010, **114**, 22303–22308.
- 8 J. J. do Rosário, J. B. Berger, E. T. Lilleodden, R. M. McMeeking and G. A. Schneider, *Extreme Mech. Lett.*, 2017, **12**, 86–96.
- 9 J. J. Roa, A. Coll, S. Bermejo, E. Jiménez-Piqué, R. Alcubilla, L. Castañer and L. Llanes, *J. Phys. Appl. Phys.*, 2016, **49**, 455303.
- 10 M. T. Barako, J. M. Weisse, S. Roy, T. Kodama, T. J. Dusseault, M. Motoyama, M. Asheghi, F. B. Prinz, X. Zheng and K. E. Goodson, in *Thermal and Thermomechanical Phenomena in Electronic Systems (ITherm)*, 2014 IEEE Intersociety Conference on, IEEE, 2014, pp. 736–743.
